# Supplementary material for: Hypomethylation of 111 Probes Predicts Poor Prognosis for Glioblastoma
Source: Front Neurosci. 2019 Oct 25;13:1137. doi: 10.3389/fnins.2019.01137 (PMC6823878; doi:10.3389/fnins.2019.01137)
Supplement: Supplementary file 3 [file Table_1.XLSX]

## Sheet: Characteristics
	Patient characteristics of all avilable GBMs with intact survival information and DNA methylation data on GPL13534
		TCGA_GBM_450k	GSE60274_450k
	Sample size	138	62
	Age
	Median	60.77	51.5
	Range	21.43~85.60	26~70
	Gender
	Male	55	47
	Female	41	15
	os_month
	Median	9.07	14.46
	Range	0.79~120.50	1.45~76.50
	survival_status
	Alive	44	3
	Dead	94	59
	MGMT
	Methylated	34	30
	Unmethylated	44	30

## Sheet: Samples in this study
GSE60274_450K										TCGA_GBM_450K													TCGA_GBM_450K with clinical molecular information
sample	Disease	MGMT	Age	Gender	Treat	os_mon	ss	Meth_p		submitter_id	gender	year_of_birth	race	year_of_death	age_at_diagnosis	vital_status	days_to_death	days_to_last_follow_up	age	os_month	ss		Case_ID	Age	Gender	MGMT	G_CIMP	IDH1	Expression	Treat	Treat2	Treatment	PFS_day	Vital_S	os_month	ss	Meth_p	Meth_g	CpG6_g	CpG6	CpG3_g	CpG3
GSM1468969	GBM	M	37	M	RT_TMZ	17.39	1	0.813582		TCGA-19-5955	male	1927	white	2010	30550	dead	54	54	83.6413	1.77442	1		TCGA-06-5416	23.4	2	2	2	NA	Proneural	TMZ	chem	1	204	Liv	6.70336	0	0.244061	0	0	-1.7617	0	-1.66005
GSM1468970	GBM	U	45	F	RT	5.65	1	0.789916		TCGA-06-5411	male	1959	white	2010	18832	dead	254	254	51.5592	8.34634	1		TCGA-14-0740	70.2	1	NA	2	2		sRT	sRT	2	364	Dec	11.9609	1	0.324513	0	0	-1.64558	1	-2.81264
GSM1468971	GBM	M	49	M	RT	9.73	1	0.861533		TCGA-14-1395	male	1951	white	2003	19237	dead	42	42	52.668	1.3801	1		TCGA-19-5955	83.6	1	1	2	2	Mesenchymal	uRT	uRT	2	54	Dec	1.77442	1	0.34931	0	0	-1.37245	1	-4.20574
GSM1468972	GBM	M	52	M	RT_TMZ	76.5	0	0.827634		TCGA-06-1806	male	1962	white	2010	17296	dead	466	--	47.3539	15.3126	1		TCGA-28-5218	63.2	1	2	2	2	Mesenchymal	sRT_TMZ	sRT_chem	3	157	Dec	5.15896	1	0.34972	0	0	-2.30753	1	-5.42677
GSM1468973	GBM	M	48	M	RT	16.31	1	0.86601		TCGA-76-4932	female	1956	white	2009	18433	dead	1458	1458	50.4668	47.9093	1		TCGA-06-5410	72.3	2	1	2	2	Mesenchymal	uRT	uRT	2	107	Dec	3.54884	1	0.35193	0	0	-3.42433	1	-5.31914
GSM1468974	GBM	U	49	M	RT	16.01	1	0.80075		TCGA-19-A6J5	male	1972	black or african american	--	14970	alive	--	868	40.9856	28.5221	0		TCGA-28-5216	52.7	1	2	2	2	Mesenchymal	TMZ	chem	1	415	Liv	13.6367	0	0.355419	0	0	0.541599	1	-3.80415
GSM1468975	GBM	M	53	M	RT	1.45	1	0.761674		TCGA-06-0221	male	1969	white	2001	11333	dead	603	548	31.0281	19.8143	1		TCGA-06-5412	78.8	2	1	2	2	Mesenchymal	sRT_TMZ	sRT_chem	3	88	Dec	4.53463	1	0.369841	0	0	-1.66979	1	-5.11808
GSM1468976	GBM	M	60	F	RT_TMZ	43.59	0	0.787622		TCGA-06-5410	female	1938	white	2010	26395	dead	108	108	72.2656	3.54884	1		TCGA-06-5411	51.6	1	2	2	2	Neural	sRT_TMZ	sRT_chem	3	213	Dec	8.34634	1	0.37021	0	0	-3.7036	1	-5.53976
GSM1468977	GBM	U	58	M	RT	8.94	1	0.758494		TCGA-26-5135	female	1937	white	2009	26490	dead	270	--	72.5257	8.87209	1		TCGA-28-5215	62.1	2	1	2	2	Mesenchymal	uRT_TMZ	uRT_chem	3	164	Dec	11.008	1	0.372771	0	0	-0.878045	1	-3.9347
GSM1468978	GBM	U	62	F	RT	4.47	1	0.819733		TCGA-28-5213	male	1938	white	--	26491	alive	--	951	72.5284	31.2495	0		TCGA-14-0781	49	1	2	2	2	Mesenchymal	uRT	uRT	2	29	Dec	0.952929	1	0.374481	0	0	-2.059	1	-5.98323
GSM1468979	GBM	M	64	M	RT_TMZ	24.26	1	0.84758		TCGA-06-0211	male	1950	white	1997	17515	dead	360	360	47.9535	11.8295	1		TCGA-19-5947	47.1	2	2	2	2	Mesenchymal	uRT	uRT	2	43	Dec	6.63764	1	0.377057	0	0	-2.33471	1	-3.03942
GSM1468980	GBM	U	27	M	RT_TMZ	10.45	1	0.778371		TCGA-06-A6S0	male	1932	black or african american	2011	29037	dead	95	--	79.499	3.12166	1		TCGA-26-5134	74.2	1	2	2	2	Proneural	sRT	sRT	2	167	Liv	5.48755	0	0.377603	0	0	-2.66301	1	-2.9101
GSM1468982	GBM	U	48	M	RT_TMZ	3.78	1	0.505844		TCGA-06-A7TK	male	1949	black or african american	--	23674	dead	444	164	64.8159	14.5897	1		TCGA-28-5220	67.4	1	2	2	2	Classical	sRT_TMZ	sRT_chem	3	262	Liv	12.7495	1	0.377723	0	0	-1.23268	1	-4.98662
GSM1468983	GBM	M	49	M	RT	15.09	1	0.787295		TCGA-26-5139	female	1945	white	--	23782	alive	--	48	65.1116	1.57726	0		TCGA-19-1389	51.1	1	2	2	2	Mesenchymal	TMZ	chem	1	81	Dec	4.6332	1	0.37856	0	0	-2.95509	1	-5.81445
GSM1468984	GBM	U	48	M	RT_TMZ	8.09	1	0.782474		TCGA-28-5219	female	1963	white	--	17254	alive	--	690	47.2389	22.6731	0		TCGA-28-5211	42.5	1	NA	2	2		TMZ	chem	1	225	Liv	11.7637	0	0.37932	0	0	-1.60139	1	-5.70797
GSM1468985	GBM	U	60	F	RT	14.5	1	0.789368		TCGA-28-5215	female	1948	white	2010	22686	dead	335	237	62.1109	11.008	1		TCGA-81-5910	64.5	1	2	2	2	Classical	uRT	uRT	2	49	Dec	1.61012	1	0.386321	0	0	0.432777	0	-2.10266
GSM1468986	GBM	U	53	M	RT_TMZ	12.36	1	0.834647		TCGA-06-5856	male	1952	white	2010	21232	dead	114	114	58.13	3.746	1		TCGA-14-0736	49.9	1	2	2	NA	Mesenchymal	sRT_TMZ	sRT_chem	3	127	Dec	15.1154	1	0.390253	0	0	-0.0142897	1	-2.53546
GSM1468987	GBM	M	44	M	RT	8.78	1	0.808598		TCGA-19-5956	female	1957	white	--	19591	dead	684	198	53.6372	22.476	1		TCGA-76-6282	63.9	1	2	2	2	Mesenchymal	TMZ	chem	1	458	Dec	17.0541	1	0.390705	0	0	-1.62005	1	-3.35294
GSM1468988	GBM	U	61	F	RT_TMZ	11.87	1	0.754039		TCGA-26-A7UX	male	1966	black or african american	--	17365	alive	--	588	47.5428	19.3214	0		TCGA-76-6193	78.7	1	2	2	2	Mesenchymal	sRT_TMZ	sRT_chem	3	64	Dec	2.69449	1	0.390977	0	0	-3.15197	1	-5.30827
GSM1468989	GBM	U	56	M	RT_TMZ	10.62	1	0.798048		TCGA-74-6577	male	1959	not reported	--	18740	alive	--	132	51.3073	4.33747	0		TCGA-76-4928	85.6	2	1	2	2	Classical	uRT_TMZ	uRT_chem	3	94	Dec	3.0888	1	0.391616	0	0	-1.67609	1	-3.98951
GSM1468990	GBM	U	54	M	RT	14.37	1	0.709558		TCGA-76-6657	male	1936	white	2010	27341	dead	153	153	74.8556	5.02752	1		TCGA-06-0650	39.9	2	2	2	2	Mesenchymal	TMZ	chem	1	351	Dec	23.5603	1	0.394756	0	0	-3.28981	1	-6.54737
GSM1468991	GBM	M	54	M	RT	23.05	1	0.824415		TCGA-26-5134	male	1935	white	--	27111	alive	--	167	74.2259	5.48755	0		TCGA-26-6174	65.4	1	NA	2	2		TMZ	chem	1	70	Liv	2.33303	0	0.394765	0	0	-4.96776	1	-5.80761
GSM1468992	GBM	U	63	M	RT	7.53	1	0.80814		TCGA-28-6450	male	1950	white	2010	22177	dead	165	165	60.7173	5.42184	1		TCGA-76-6285	64.8	2	2	2	2	Proneural	TMZ Chemo	chem	1	253	Dec	8.34634	1	0.398442	0	0	-2.14411	1	-2.97413
GSM1468993	GBM	U	48	F	RT_TMZ	9.21	1	0.772836		TCGA-19-5951	female	1934	white	2010	27995	dead	244	244	76.6461	8.01774	1		TCGA-06-6390	58.4	1	2	2	2	Classical	TMZ	chem	1	163	Dec	5.38898	1	0.399542	0	0	-4.35232	1	-5.93838
GSM1468994	GBM	M	56	M	RT	7.53	1	0.824827		TCGA-06-A7TL	female	1983	black or african american	--	11297	alive	--	539	30.9295	17.7113	0		TCGA-32-1980	72.5	1	2	2	2	Neural	uRT	uRT	2	36	Dec	1.18295	1	0.399547	0	0	-4.77844	1	-6.80311
GSM1468995	GBM	M	51	M	RT	26.76	1	0.840301		TCGA-28-5208	male	1958	white	--	19053	dead	544	474	52.1643	17.8756	1		TCGA-76-6191	57.3	1	2	2	2	Proneural	TMZ	chem	1	322	Dec	16.6927	1	0.400456	0	0	-0.897237	1	-4.06478
GSM1468996	GBM	M	44	M	RT_TMZ	36	1	0.837126		TCGA-06-6699	female	1953	white	--	21190	alive	--	47	58.0151	1.5444	0		TCGA-06-0171	65.9	1	NA	2	2	Neural	uRT_TMZ	uRT_chem	3	117	Dec	13.111	1	0.401021	0	0	-1.58447	1	-3.99965
GSM1468997	GBM	M	53	M	RT	16.41	1	0.819109		TCGA-76-4935	female	1958	white	--	19231	dead	1121	328	52.6516	36.8356	1		TCGA-06-0210	72.8	2	NA	2	2	Mesenchymal	sRT	sRT	2	67	Dec	7.39341	1	0.401682	0	0	-0.140897	1	-3.14096
GSM1468998	GBM	U	62	M	RT	11.38	1	0.789036		TCGA-06-0210	female	1925	white	1997	26600	dead	225	151	72.8268	7.39341	1		TCGA-06-0190	62.5	1	NA	2	2	Mesenchymal	sRT_TMZ	sRT_chem	3	88	Dec	10.4165	1	0.40498	0	0	-2.04509	1	-3.70826
GSM1468999	GBM	U	56	M	RT_TMZ	16.41	1	0.840925		TCGA-06-6389	female	1962	white	--	18248	alive	--	237	49.9603	7.78773	0		TCGA-06-5408	54.9	2	2	2	2	Classical	sRT_TMZ	sRT_chem	3	157	Dec	11.7309	1	0.409741	0	0	-1.24218	1	-2.92606
GSM1469000	GBM	M	59	M	RT	5.59	1	0.827713		TCGA-76-4927	male	1947	white	2006	21193	dead	535	535	58.0233	17.5799	1		TCGA-12-5301	59.6	1	1	2	2	Neural	TMZ	chem	1	61	Dec	2.0373	1	0.410336	0	0	-0.510591	1	-2.58192
GSM1469001	GBM	U	32	M	RT_TMZ	6.97	1	0.820422		TCGA-06-0171	male	1937	white	2003	24085	dead	399	396	65.9411	13.111	1		TCGA-06-6391	44.4	2	1	2	2	Proneural	uRT	uRT	2	44	Dec	1.47868	1	0.412517	0	0	-4.99675	1	-6.51581
GSM1469002	GBM	M	55	F	RT_TMZ	24.1	1	0.758925		TCGA-19-4065	male	1973	white	--	13257	alive	--	214	36.2957	7.03196	0		TCGA-19-5952	62.5	1	2	2	2	Classical	uRT	uRT	2	575	Dec	18.8943	1	0.413769	0	0	-2.35021	1	-2.8118
GSM1469003	GBM	U	41	M	RT	15.68	1	0.775523		TCGA-06-5412	female	1932	white	2010	28762	dead	138	138	78.7461	4.53463	1		TCGA-76-4934	66.6	2	1	2	2	Proneural	Unspecified_T	NA	0	77	Dec	2.53019	1	0.414728	0	0	-0.946272	0	-1.93955
GSM1469004	GBM	M	49	F	RT_TMZ	41.19	1	0.815228		TCGA-19-5959	female	1933	white	--	28449	dead	511	161	77.8891	16.7913	1		TCGA-28-5213	72.5	1	2	2	2	Mesenchymal	sRT_TMZ	sRT_chem	3	298	Liv	31.2495	0	0.41553	0	0	-0.91246	1	-5.61254
GSM1469005	GBM	M	57	M	RT	9.37	1	0.723351		TCGA-06-6694	female	1918	white	1994	27909	dead	224	224	76.4107	7.36055	1		TCGA-06-1804	81.6	2	1	2	2	Classical	Unspecified_T	NA	0	413	Dec	13.6039	1	0.415949	0	0	0.368458	1	-4.70084
GSM1469006	GBM	M	63	M	RT_TMZ	6.48	1	0.781734		TCGA-28-5204	male	1937	white	2010	26490	dead	454	--	72.5257	14.9183	1		TCGA-28-5207	71.1	1	2	2	2	Mesenchymal	uRT_TMZ	uRT_chem	3	343	Dec	11.2708	1	0.417051	0	0	-1.18504	1	-3.74424
GSM1469007	GBM	U	49	F	RT_TMZ	14.43	1	0.811938		TCGA-76-6662	male	1953	white	--	21511	dead	1048	282	58.8939	34.4369	1		TCGA-06-6388	64.4	2	NA	2	2		TMZ	chem	1	84	Dec	5.22468	1	0.4188	0	0	-1.23985	1	-4.44802
GSM1469008	GBM	U	63	M	RT_TMZ	14.76	1	0.772159		TCGA-06-A5U0	female	1991	black or african american	--	7958	alive	--	815	21.7878	26.7806	0		TCGA-19-0957	48.5	2	2	2	2	Proneural	TMZ	chem	1	50	Dec	21.8845	1	0.42111	0	0	-1.16676	1	-5.90862
GSM1469009	GBM	U	50	M	NA	3.81	1	0.516244		TCGA-06-6390	male	1953	white	2011	21328	dead	164	164	58.3929	5.38898	1		TCGA-28-5208	52.2	1	1	2	2	Mesenchymal	TMZ	chem	1	147	Liv	17.8756	1	0.422318	0	0	0.563155	0	-2.16018
GSM1469010	GBM	U	57	M	RT_TMZ	5.98	1	0.795972		TCGA-4W-AA9R	male	1951	black or african american	--	22317	alive	--	124	61.1006	4.07459	0		TCGA-76-6192	74.8	1	2	2	2	Proneural	sRT_TMZ	sRT_chem	3	76	Dec	3.28596	1	0.422616	0	0	-2.51238	1	-5.18327
GSM1469011	GBM	M	52	F	RT	32.48	0	0.828865		TCGA-06-A6S1	female	1959	black or african american	2012	19443	dead	78	--	53.232	2.56305	1		TCGA-26-5135	72.5	2	1	2	2	Proneural	uRT	uRT	2	269	Dec	8.87209	1	0.426601	0	0	-0.484104	1	-3.87105
GSM1469012	GBM	U	43	M	RT_TMZ	17	1	0.834177		TCGA-76-6193	male	1932	not reported	2010	28742	dead	82	82	78.6913	2.69449	1		TCGA-26-6173	57.8	1	NA	2	2		TMZ	chem	1	241	Liv	7.91917	0	0.427416	0	0	-1.93698	1	-4.93488
GSM1469013	GBM	U	55	F	RT_TMZ	5.75	1	0.602743		TCGA-06-0125	female	1938	white	2004	23343	dead	1448	1439	63.9097	47.5807	1		TCGA-19-5954	72.2	2	1	2	2	Classical	TMZ	chem	1	242	Liv	12.0923	1	0.429164	0	0	-0.67601	1	-2.64187
GSM1469014	GBM	U	52	M	RT_TMZ	8.61	1	0.831473		TCGA-26-5136	female	1931	white	--	28496	dead	577	37	78.0178	18.96	1		TCGA-06-5418	75.5	2	2	2	2	Mesenchymal	uRT	uRT	2	83	Dec	2.72735	1	0.429499	0	0	-1.64203	1	-2.75103
GSM1469015	GBM	U	43	M	RT	15.65	1	0.808726		TCGA-19-5958	male	1954	white	--	20466	dead	428	164	56.0329	14.0639	1		TCGA-76-4926	68.7	1	2	2	2	Classical	uRT_TMZ	uRT_chem	3	34	Dec	4.53463	1	0.430293	0	0	-0.871716	1	-4.42932
GSM1469016	GBM	U	44	F	RT	5.33	1	0.741144		TCGA-06-1804	female	1928	white	2010	29802	dead	414	414	81.5934	13.6039	1		TCGA-26-5136	78	2	1	2	2	Mesenchymal	uRT	uRT	2	37	Liv	18.96	1	0.431452	0	0	-1.24558	1	-4.21819
GSM1469018	GBM	N	56	F	RT_TMZ	23	1	0.815365		TCGA-76-4931	female	1935	white	2005	25812	dead	279	279	70.6694	9.16783	1		TCGA-06-5858	45.6	2	1	2	2	Mesenchymal	TMZ	chem	1	97	Liv	6.14475	0	0.433725	0	0	-3.96488	1	-5.06448
GSM1469019	GBM	N	62	M	RT_TMZ	25	1	0.850538		TCGA-76-6282	male	1944	white	2008	23323	dead	519	519	63.8549	17.0541	1		TCGA-06-0125	63.9	2	1	2	2	Classical	TMZ	chem	1	797	Dec	47.5807	1	0.435669	0	0	0.0704154	0	-1.87952
GSM1469021	GBM	U	45	M	NA	9	1	0.75657		TCGA-28-5216	male	1958	white	--	19239	alive	--	415	52.6735	13.6367	0		TCGA-06-6698	53.6	2	NA	2	2		uRT_TMZ	uRT_chem	3	145	Liv	4.76464	0	0.435865	0	1	-5.38325	1	-3.11159
GSM1469022	GBM	M	36	M	RT_TMZ	60	1	0.837906		TCGA-06-6391	female	1967	white	2011	16206	dead	45	--	44.3696	1.47868	1		TCGA-19-5958	56	1	2	2	2	Classical	TMZ	chem	1	164	Liv	14.0639	1	0.436746	0	0	-1.26157	1	-4.46197
GSM1469023	GBM	M	45	F	RT_TMZ	17	1	0.799555		TCGA-76-6280	male	1950	white	2007	20931	dead	346	346	57.306	11.3694	1		TCGA-19-5951	76.7	1	2	2	2	Classical	TMZ	chem	1	244	Dec	8.01774	1	0.437146	0	0	0.525276	0	-1.6994
GSM1469024	GBM	M	68	M	NA	9	1	0.731648		TCGA-26-6174	female	1946	white	--	23884	alive	--	71	65.3908	2.33303	0		TCGA-06-0152	68	1	NA	2	2	Mesenchymal	uRT	uRT	2	299	Dec	12.3224	1	0.438909	1	0	-0.231532	1	-3.41301
GSM1469025	GBM	U	26	M	RT_TMZ	17	1	0.832118		TCGA-76-6660	male	1937	white	2010	26913	dead	114	--	73.6838	3.746	1		TCGA-14-1395	52.7	1	NA	2	2		Alkyl	chem	1	42	Dec	1.3801	1	0.43919	1	0	-0.737066	1	-2.49787
GSM1469026	GBM	M	36	M	RT_TMZ	28	1	0.873293		TCGA-28-5209	female	1944	white	--	24362	alive	--	77	66.6995	2.53019	0		TCGA-06-6700	76.2	1	NA	2	2		TMZ	chem	1	145	Liv	4.76464	0	0.439985	1	0	-3.10091	1	-5.60314
GSM1469027	GBM	M	65	M	RT_TMZ	9	1	0.70558		TCGA-06-0190	male	1944	white	2006	22835	dead	317	313	62.5188	10.4165	1		TCGA-06-0211	48	1	NA	2	2	Classical	sRT_Alkyl	sRT_chem	3	53	Dec	11.8295	1	0.441067	1	0	-0.573312	1	-3.02809
GSM1469029	GBM	M	48	F	NA	27	1	0.78795		TCGA-76-6191	male	1952	white	2010	20937	dead	508	508	57.3224	16.6927	1		TCGA-76-4929	76.2	2	1	2	2	Neural	Unspecified_T	NA	0	111	Dec	3.64742	1	0.441422	1	0	-0.310644	1	-6.24229
GSM1469030	GBM	U	48	M	RT_TMZ	16	1	0.808744		TCGA-19-5952	male	1948	white	2011	22841	dead	575	567	62.5352	18.8943	1		TCGA-26-5139	65.1	2	2	2	2	Mesenchymal	uRT	uRT	2	48	Liv	1.57726	0	0.442255	1	0	-0.162446	0	-1.96505
GSM1469031	GBM	M	37	M	RT_TMZ	15	1	0.803777		TCGA-06-0152	male	1927	white	1996	24844	dead	375	359	68.0192	12.3224	1		TCGA-32-1979	69.1	2	1	2	2	Classical	Unspecified_T	NA	0	265	Dec	19.4857	1	0.442467	1	0	0.17005	1	-2.74915
GSM1469042	GBM	M	42	M	NA	16	1	0.730017		TCGA-19-0957	female	1959	white	2008	17714	dead	666	666	48.4983	21.8845	1		TCGA-76-4927	58	1	2	2	2	Neural	Unspecified_T	NA	0	535	Dec	17.5799	1	0.444383	1	0	-2.09816	1	-4.24517
GSM1469044	GBM	M	70	M	NA	13	1	0.751722		TCGA-76-4928	female	1920	white	2005	31267	dead	94	94	85.6044	3.0888	1		TCGA-76-4931	70.7	2	2	2	2	Classical	uRT_TMZ	uRT_chem	3	112	Dec	9.16783	1	0.445734	1	0	-1.37243	0	-1.63207
GSM1469045	GBM	M	51	M	NA	52	1	0.820505		TCGA-06-5418	female	1935	white	2010	27584	dead	83	83	75.5209	2.72735	1		TCGA-19-5959	77.9	2	1	2	2	Classical	TMZ	chem	1	119	Liv	16.7913	1	0.446332	1	0	-0.230183	0	-2.2881
										TCGA-26-5133	male	1950	white	--	21560	alive	--	452	59.0281	14.8525	0		TCGA-32-5222	66.1	1	1	2	2	Proneural	TMZ	chem	1	118	Liv	19.2229	1	0.449665	1	0	-0.390454	1	-2.71057
										TCGA-19-5947	female	1963	black or african american	2010	17218	dead	202	202	47.1403	6.63764	1		TCGA-28-5219	47.2	2	1	2	2	Classical	uRT_TMZ	uRT_chem	3	258	Liv	22.6731	0	0.449987	1	0	-1.12226	1	-6.72682
										TCGA-74-6578	male	1952	not reported	--	21464	alive	--	436	58.7652	14.3268	0		TCGA-76-4925	76.7	1	1	2	2	Proneural	uRT_TMZ	uRT_chem	3	87	Dec	4.7975	1	0.450206	1	0	-0.699424	1	-2.54595
										TCGA-74-6575	female	1936	not reported	--	26827	alive	--	636	73.4483	20.8987	0		TCGA-06-5856	58.1	1	2	2	2	Classical	uRT	uRT	2	114	Dec	3.746	1	0.450827	1	0	-1.52443	1	-2.49388
										TCGA-RR-A6KA	female	1940	black or african american	2012	26582	dead	191	--	72.7775	6.27618	1		TCGA-28-6450	60.7	1	2	2	2	Classical	TMZ	chem	1	165	Dec	5.42184	1	0.45176	1	0	-2.61866	1	-3.46407
										TCGA-76-6192	male	1936	white	2010	27322	dead	100	100	74.8036	3.28596	1		TCGA-14-1043	61.3	1	NA	2	2		uRT	uRT	2	24	Dec	0.788631	1	0.454269	1	0	-3.22934	1	-4.70377
										TCGA-81-5911	male	1977	white	--	12292	alive	--	539	33.6537	17.7113	0		TCGA-74-6573	67.4	1	NA	2	2		TMZ	chem	1	105	Dec	3.45026	1	0.45681	1	0	-1.47537	1	-2.65585
										TCGA-32-1980	male	1936	white	2008	26467	dead	36	36	72.4627	1.18295	1		TCGA-76-4935	52.6	2	1	2	2	Proneural	sRT_TMZ	sRT_chem	3	328	Liv	36.8356	1	0.457091	1	0	-0.871385	1	-4.88034
										TCGA-76-6664	female	1962	white	--	18054	alive	--	1101	49.4292	36.1784	0		TCGA-19-5956	53.6	2	2	2	NA	Proneural	TMZ	chem	1	198	Liv	22.476	1	0.460702	1	0	-4.28216	1	-4.3088
										TCGA-12-5301	male	1951	white	2010	21768	dead	62	62	59.5975	2.0373	1		TCGA-28-5204	72.5	1	2	2	2	Neural	TMZ	chem	1	454	Dec	14.9183	1	0.469215	1	0	-1.37333	0	-1.96073
										TCGA-06-A5U1	female	1933	black or african american	2011	28545	dead	57	--	78.152	1.873	1		TCGA-06-5413	67	1	2	2	2	Neural	sRT_TMZ	sRT_chem	3	195	Liv	8.80637	0	0.472123	1	0	-1.72879	1	-4.58007
										TCGA-19-5954	female	1938	white	--	26355	dead	368	242	72.1561	12.0923	1		TCGA-19-5950	52.7	2	1	2	2	Classical	TMZ	chem	1	294	Liv	17.1856	1	0.472951	1	0	-2.52947	1	-2.70126
										TCGA-76-6285	female	1944	white	2008	23674	dead	254	254	64.8159	8.34634	1		TCGA-14-1450	57.4	1	NA	2	2		TMZ	chem	1	826	Liv	58.753	0	0.480337	1	0	-3.59159	1	-5.87062
										TCGA-19-1389	male	1957	white	2008	18659	dead	141	141	51.0856	4.6332	1		TCGA-06-5415	60.8	1	2	2	2	Classical	TMZ	chem	1	260	Liv	8.5435	0	0.482445	1	0	-1.0465	1	-2.77904
										TCGA-4W-AA9S	male	1944	black or african american	--	25545	alive	--	44	69.9384	1.44582	0		TCGA-12-5299	56	2	2	2	2	Classical	TMZ	chem	1	98	Dec	3.22024	1	0.482488	1	0	-2.3196	0	-1.66831
										TCGA-76-4929	female	1929	white	2005	27831	dead	111	111	76.1971	3.64742	1		TCGA-14-1402	58.6	2	1	2	NA	Classical	sRT_TMZ	sRT_chem	3	333	Dec	32.0381	1	0.48457	1	0	-0.393566	1	-3.19047
										TCGA-26-6173	male	1953	white	--	21093	alive	--	241	57.7495	7.91917	0		TCGA-06-5414	61.7	1	2	2	2	Classical	TMZ	chem	1	167	Liv	8.97067	0	0.49128	1	0	-1.30512	1	-3.22155
										TCGA-32-1979	female	1939	white	2009	25252	dead	593	593	69.1362	19.4857	1		TCGA-28-5214	53.4	1	2	2	2	Mesenchymal	uRT_TMZ	uRT_chem	3	247	Liv	23.4289	1	0.497688	1	0	-1.79168	1	-4.62616
										TCGA-76-4934	female	1943	white	2009	24319	dead	77	77	66.5818	2.53019	1		TCGA-06-5859	63.5	1	2	2	2	Neural	TMZ	chem	1	138	Liv	4.56749	0	0.502819	1	0	-0.771981	1	-7.22266
										TCGA-15-1444	male	1983	white	2008	7827	dead	1537	--	21.4292	50.5052	1		TCGA-41-5651	59.4	2	1	2	2	Proneural	TMZ	chem	1	210	Liv	15.1154	1	0.504194	1	0	-1.59017	1	-6.91338
										TCGA-06-5413	male	1943	white	--	24477	alive	--	268	67.0144	8.80637	0		TCGA-87-5896	50.4	2	2	2	2	Classical	Unspecified_T	NA	0	2	Liv	26.2877	0	0.504345	1	0	-0.848821	0	-2.35354
										TCGA-12-5299	female	1953	white	2009	20463	dead	98	98	56.0246	3.22024	1		TCGA-76-4932	50.5	2	1	2	2	Proneural	sRT_TMZ	sRT_chem	3	1458	Dec	47.9093	1	0.506199	1	0	-0.182639	0	-1.98847
										TCGA-19-5953	male	1952	white	2010	21204	dead	144	144	58.0534	4.73178	1		TCGA-12-5295	60.7	2	1	2	2	Neural	TMZ	chem	1	398	Dec	14.9183	1	0.518251	1	0	-1.06504	1	-3.07323
										TCGA-76-6283	female	1936	white	2007	26002	dead	165	--	71.1896	5.42184	1		TCGA-28-5209	66.7	2	1	2	2	Mesenchymal	uRT_TMZ	uRT_chem	3	77	Liv	2.53019	0	0.519899	1	0	-2.43315	0	-1.18487
										TCGA-76-6656	male	1944	black or african american	2010	24265	dead	147	147	66.4339	4.83036	1		TCGA-06-6695	64.1	1	NA	2	2		TMZ	chem	1	132	Liv	8.31348	0	0.526352	1	0	-1.77463	1	-3.03496
										TCGA-28-5207	male	1939	white	2010	25975	dead	343	275	71.1157	11.2708	1		TCGA-19-5960	56.5	1	2	2	2	Proneural	TMZ	chem	1	165	Liv	14.9511	1	0.534017	1	0	-0.905554	1	-4.47416
										TCGA-RR-A6KC	male	1955	black or african american	2011	20302	dead	625	--	55.5838	20.5373	1		TCGA-14-1034	60.3	2	1	2	2	Mesenchymal	sRT_Alkyl	sRT_chem	3	274	Dec	15.9369	1	0.551671	1	0	-1.28822	1	-3.4591
										TCGA-06-6695	male	1946	white	--	23426	alive	--	253	64.1369	8.31348	0		TCGA-26-5132	74.5	1	1	2	2	Classical	TMZ	chem	1	286	Liv	9.39785	0	0.565027	1	0	-0.702267	1	-5.90945
										TCGA-74-6573	male	1942	not reported	2009	24632	dead	105	--	67.4387	3.45026	1		TCGA-26-5133	59	1	2	1	2	G-CIMP	TMZ	chem	1	370	Liv	14.8525	0	0.588273	1	0	-4.82503	0	-2.45369
										TCGA-26-5132	male	1935	white	--	27196	alive	--	286	74.4586	9.39785	0		TCGA-15-1444	21.4	NA	1	2	1	Proneural	uRT	uRT	2	0		50.5052	1	0.598981	1	1	-5.76984	1	-9.42847
										TCGA-14-0862	male	1942	white	2002	22179	dead	88	88	60.7228	2.89165	1		TCGA-26-1442	43.7	1	1	1	1	G-CIMP	TMZ	chem	1	953	Liv	31.3152	0	0.619637	1	1	-6.68557	1	-8.46747
										TCGA-74-6581	male	1933	not reported	--	28263	alive	--	250	77.3799	8.2149	0		TCGA-06-0221	31	1	NA	1	1	Neural	sRT	sRT	2	260	Dec	19.8143	1	0.655918	1	1	-5.85898	1	-9.68513
										TCGA-06-6700	male	1935	white	--	27850	alive	--	145	76.2491	4.76464	0		TCGA-06-6389	50	2	1	1	1	G-CIMP	TMZ	chem	1	236	Liv	7.78773	0	0.667075	1	1	-7.76688	1	-9.71274
										TCGA-81-5910	male	1945	white	2009	23567	dead	49	--	64.5229	1.61012	1		TCGA-06-5417	45.4	2	1	1	1	G-CIMP	TMZ	chem	1	155	Liv	5.09324	0	0.700858	1	0	-4.17842	1	-8.96294
										TCGA-28-5218	male	1947	white	2010	23096	dead	157	128	63.2334	5.15896	1		TCGA-06-6701	60.4	1	NA	1	1		TMZ	chem	1	151	Liv	4.9618	0	0.720525	1	1	-7.67124	1	-11.2525
										TCGA-19-A60I	male	1973	black or african american	--	14437	alive	--	541	39.5264	17.777	0
										TCGA-OX-A56R	male	1944	black or african american	2012	25178	dead	180	--	68.9336	5.91473	1
										TCGA-41-5651	female	1951	black or african american	--	21698	dead	460	351	59.4059	15.1154	1
										TCGA-06-6693	female	1929	white	2003	23585	dead	3667	15	64.5722	120.496	1
										TCGA-14-0781	male	1954	black or african american	2003	17903	dead	29	29	49.0157	0.952929	1
										TCGA-76-6661	male	1957	white	--	19965	dead	727	7	54.6612	23.8889	1
										TCGA-06-5414	male	1949	white	--	22527	alive	--	273	61.6756	8.97067	0
										TCGA-06-6697	male	1945	white	--	23763	alive	--	391	65.0595	12.8481	0
										TCGA-06-6698	female	1958	white	--	19591	alive	--	145	53.6372	4.76464	0
										TCGA-06-6701	male	1951	white	--	22051	alive	--	151	60.3723	4.9618	0
										TCGA-28-5214	male	1957	white	--	19520	dead	713	432	53.4428	23.4289	1
										TCGA-41-6646	female	1938	white	--	26667	dead	379	236	73.0103	12.4538	1
										TCGA-19-5950	female	1958	white	--	19244	dead	523	343	52.6872	17.1856	1
										TCGA-76-4926	male	1937	white	2005	25085	dead	138	138	68.679	4.53463	1
										TCGA-14-1043	male	1943	white	2004	22392	dead	24	24	61.306	0.788631	1
										TCGA-76-6663	female	1967	white	--	16126	dead	567	235	44.1506	18.6314	1
										TCGA-06-6388	female	1947	white	2011	23519	dead	159	120	64.3915	5.22468	1
										TCGA-06-5416	female	1987	white	--	8533	alive	--	204	23.3621	6.70336	0
										TCGA-06-5415	male	1950	white	--	22213	alive	--	260	60.8159	8.5435	0
										TCGA-14-0740	male	1932	white	2002	25627	dead	364	364	70.1629	11.9609	1
										TCGA-28-5220	male	1943	white	--	24622	dead	388	319	67.4114	12.7495	1
										TCGA-14-1402	female	1947	white	2007	21421	dead	975	975	58.6475	32.0381	1
										TCGA-14-0736	male	1950	black or african american	2000	18219	dead	460	460	49.8809	15.1154	1
										TCGA-76-6286	male	1949	white	2010	22173	dead	638	638	60.7064	20.9644	1
										TCGA-32-5222	male	1944	white	--	24134	dead	585	323	66.0753	19.2229	1
										TCGA-19-5960	male	1954	white	--	20641	dead	455	165	56.512	14.9511	1
										TCGA-19-A6J4	male	1945	black or african american	2013	25058	dead	121	--	68.6051	3.97601	1
										TCGA-06-5417	female	1965	white	--	16572	alive	--	155	45.3717	5.09324	0
										TCGA-76-4925	male	1929	white	2005	28011	dead	146	146	76.6899	4.7975	1
										TCGA-74-6584	female	1955	not reported	--	20232	alive	--	228	55.3922	7.49199	0
										TCGA-14-1034	female	1939	not reported	2000	22029	dead	485	485	60.3121	15.9369	1
										TCGA-4W-AA9T	female	1958	black or african american	--	19801	alive	--	778	54.2122	25.5648	0
										TCGA-06-5408	female	1955	white	2009	20063	dead	357	342	54.9295	11.7309	1
										TCGA-06-5858	female	1965	white	--	16662	alive	--	187	45.6181	6.14475	0
										TCGA-26-1442	male	1965	white	--	15950	alive	--	953	43.6687	31.3152	0
										TCGA-14-1450	female	1948	black or african american	--	20960	alive	--	1788	57.3854	58.753	0
										TCGA-06-0650	female	1968	white	2008	14560	dead	717	717	39.8631	23.5603	1
										TCGA-12-5295	female	1948	white	2009	22161	dead	454	399	60.6735	14.9183	1
										TCGA-06-5859	male	1948	white	--	23211	alive	--	139	63.5483	4.56749	0
										TCGA-87-5896	female	1960	white	--	18391	alive	--	800	50.3518	26.2877	0
										TCGA-28-5211	male	1968	black or african american	--	15507	alive	--	358	42.4559	11.7637	0

## Sheet: Tumor and Gliomas gene list
	COSMIC-Tumor				OMIM-Gliomas				Gliomas_Tumor
	ensemble	entrez	name		ensemble	entrez	name		name
	ENSG00000148584	29974	A1CF		ENSG00000137875	10017	BCL2L10		AKT1
	ENSG00000136754	10006	ABI1		ENSG00000181404	100287171	WASH1		APC
	ENSG00000097007	25	ABL1		ENSG00000106069	101928168	CHN2		ATM
	ENSG00000143322	27	ABL2		ENSG00000103319	101930123	EEF2K		BAX
	ENSG00000144476	57007	ACKR3		ENSG00000137845	102	ADAM10		BCL2
	ENSG00000123983	2181	ACSL3		ENSG00000105810	1021	CDK6		BCL2L12
	ENSG00000164398	23305	ACSL6		ENSG00000147889	1029	CDKN2A		BIRC6
	ENSG00000115170	90	ACVR1		ENSG00000147883	1030	CDKN2B		BRAF
	ENSG00000121989	92	ACVR2A		ENSG00000164741	10395	DLC1		BRCA2
	ENSG00000172493	4299	AFF1		ENSG00000130560	10422	UBAC1		BUB1B
	ENSG00000144218	3899	AFF3		ENSG00000013810	10460	TACC3		CCND1
	ENSG00000072364	27125	AFF4		ENSG00000131236	10487	CAP1		CD274
	ENSG00000127914	10142	AKAP9		ENSG00000100568	10490	VTI1B		CDK6
	ENSG00000142208	207	AKT1		ENSG00000169692	10555	AGPAT2		CDKN2A
	ENSG00000105221	208	AKT2		ENSG00000169220	10636	RGS14		CTNNB1
	ENSG00000117020	10000	AKT3		ENSG00000185737	10718	NRG3		DAXX
	ENSG00000111275	217	ALDH2		ENSG00000198408	10724	MGEA5		DCTN1
	ENSG00000171094	238	ALK		ENSG00000122512	107984056	PMS2		EGFR
	ENSG00000184675	139285	AMER1		ENSG00000105438	10945	KDELR1		EPAS1
	ENSG00000029534	286	ANK1		ENSG00000139278	11010	GLIPR1		ERBB2
	ENSG00000134982	324	APC		ENSG00000070748	1103	CHAT		FAT1
	ENSG00000179750	9582	APOBEC3B		ENSG00000167005	11051	NUDT21		FGFR1
	ENSG00000169083	367	AR		ENSG00000053254	1112	FOXN3		FGFR3
	ENSG00000078061	369	ARAF		ENSG00000163430	11167	FSTL1		FLCN
	ENSG00000145819	23092	ARHGAP26		ENSG00000164985	11168	PSIP1		GOPC
	ENSG00000100852	394	ARHGAP5		ENSG00000110721	1119	CHKA		H3F3A
	ENSG00000104728	9639	ARHGEF10		ENSG00000106069	1124	CHN2		HIF1A
	ENSG00000074964	55160	ARHGEF10L		ENSG00000109466	11275	KLHL2		HIST1H3B
	ENSG00000196914	23365	ARHGEF12		ENSG00000133393	123811	FOPNL		IDH1
	ENSG00000117713	8289	ARID1A		ENSG00000174600	1240	CMKLR1		IDH2
	ENSG00000049618	57492	ARID1B		ENSG00000213903	1241	LTB4R		KDM5A
	ENSG00000189079	196528	ARID2		ENSG00000176256	127540	HMGB4		KDR
	ENSG00000143437	405	ARNT		ENSG00000151353	129787	TMEM18		KRAS
	ENSG00000169696	79058	ASPSCR1		ENSG00000189308	132660	LIN54		MGMT
	ENSG00000171456	171023	ASXL1		ENSG00000164509	133396	IL31RA		MLH1
	ENSG00000143970	55252	ASXL2		ENSG00000188643	140576	S100A16		MSH2
	ENSG00000123268	466	ATF1		ENSG00000108342	1440	CSF3		MSH6
	ENSG00000138363	471	ATIC		ENSG00000038427	1462	VCAN		MTOR
	ENSG00000149311	472	ATM		ENSG00000163599	1493	CTLA4		NBN
	ENSG00000163399	476	ATP1A1		ENSG00000168036	1499	CTNNB1		NF1
	ENSG00000067842	492	ATP2B3		ENSG00000164733	1508	CTSB		NRAS
	ENSG00000175054	545	ATR		ENSG00000122694	152007	GLIPR2		PDGFRA
	ENSG00000085224	546	ATRX		ENSG00000204209	1616	DAXX		PIK3CA
	ENSG00000103126	8312	AXIN1		ENSG00000166068	161742	SPRED1		PIK3R1
	ENSG00000168646	8313	AXIN2		ENSG00000153902	163175	LGI4		PMS2
	ENSG00000163930	8314	BAP1		ENSG00000204843	1639	DCTN1		POT1
	ENSG00000138376	580	BARD1		ENSG00000197766	1675	CFD		PPARG
	ENSG00000087088	581	BAX		ENSG00000187908	1755	DMBT1		PSIP1
	ENSG00000198604	11177	BAZ1A		ENSG00000146648	1956	EGFR		PTEN
	ENSG00000142867	8915	BCL10		ENSG00000105767	199731	CADM4		PTPN11
	ENSG00000119866	53335	BCL11A		ENSG00000154803	201163	FLCN		RAC1
	ENSG00000127152	64919	BCL11B		ENSG00000074800	2023	ENO1		RAF1
	ENSG00000171791	596	BCL2		ENSG00000111674	2026	ENO2		RB1
	ENSG00000126453	83596	BCL2L12		ENSG00000168481	203190	LGI3		ROS1
	ENSG00000069399	602	BCL3		ENSG00000116016	2034	EPAS1		SMARCE1
	ENSG00000113916	604	BCL6		ENSG00000196411	2050	EPHB4		STAT3
	ENSG00000110987	605	BCL7A		ENSG00000141736	2064	ERBB2		SUFU
	ENSG00000116128	607	BCL9		ENSG00000142208	207	AKT1		TERT
	ENSG00000186174	283149	BCL9L		ENSG00000164434	2173	FABP7		TP53
	ENSG00000029363	9774	BCLAF1		ENSG00000083857	2195	FAT1		TSC1
	ENSG00000183337	54880	BCOR		ENSG00000166889	219988	PATL1		TSC2
	ENSG00000085185	63035	BCORL1		ENSG00000102678	2254	FGF9		VHL
	ENSG00000186716	613	BCR		ENSG00000077782	2260	FGFR1
	ENSG00000023445	330	BIRC3		ENSG00000068078	2261	FGFR3
	ENSG00000115760	57448	BIRC6		ENSG00000131873	22856	CHSY1
	ENSG00000197299	641	BLM		ENSG00000075945	22920	KIFAP3
	ENSG00000112175	653	BMP5		ENSG00000118482	23469	PHF3
	ENSG00000107779	657	BMPR1A		ENSG00000146122	23500	DAAM2
	ENSG00000157764	673	BRAF		ENSG00000105467	23546	SYNGR4
	ENSG00000012048	672	BRCA1		ENSG00000186318	23621	BACE1
	ENSG00000139618	675	BRCA2		ENSG00000151012	23657	SLC7A11
	ENSG00000169925	8019	BRD3		ENSG00000182985	23705	CADM1
	ENSG00000141867	23476	BRD4		ENSG00000198793	2475	MTOR
	ENSG00000136492	83990	BRIP1		ENSG00000108001	253738	EBF3
	ENSG00000133639	694	BTG1		ENSG00000137700	2542	SLC37A4
	ENSG00000010671	695	BTK		ENSG00000197275	25788	RAD54B
	ENSG00000156970	701	BUB1B		ENSG00000148337	25792	CIZ1
	ENSG00000261652	145788	C15orf65		ENSG00000128513	25913	POT1
	ENSG00000163026	80304	C2orf44		ENSG00000066279	259266	ASPM
	ENSG00000157388	776	CACNA1D		ENSG00000119403	26147	PHF19
	ENSG00000179218	811	CALR		ENSG00000141448	2627	GATA6
	ENSG00000171735	23261	CAMTA1		ENSG00000146729	2631	GBAS
	ENSG00000171302	124583	CANT1		ENSG00000131095	2670	GFAP
	ENSG00000198286	84433	CARD11		ENSG00000119684	27030	MLH3
	ENSG00000110619	833	CARS		ENSG00000050165	27122	DKK3
	ENSG00000137812	57082	CASC5		ENSG00000160111	27151	CPAMD8
	ENSG00000164305	836	CASP3		ENSG00000150593	27250	PDCD4
	ENSG00000064012	841	CASP8		ENSG00000178445	2731	GLDC
	ENSG00000132906	842	CASP9		ENSG00000074047	2736	GLI2
	ENSG00000129993	863	CBFA2T3		ENSG00000106571	2737	GLI3
	ENSG00000067955	865	CBFB		ENSG00000154188	284	ANGPT1
	ENSG00000110395	867	CBL		ENSG00000091879	285	ANGPT2
	ENSG00000114423	868	CBLB		ENSG00000183814	286826	LIN9
	ENSG00000142273	23624	CBLC		ENSG00000030582	2896	GRN
	ENSG00000108091	8030	CCDC6		ENSG00000096092	28978	TMEM14A
	ENSG00000100814	57820	CCNB1IP1		ENSG00000120217	29126	CD274
	ENSG00000112237	892	CCNC		ENSG00000084207	2950	GSTP1
	ENSG00000110092	595	CCND1		ENSG00000116062	2956	MSH6
	ENSG00000118971	894	CCND2		ENSG00000103319	29904	EEF2K
	ENSG00000112576	896	CCND3		ENSG00000111817	29940	DSE
	ENSG00000105173	898	CCNE1		ENSG00000163041	3020	H3F3A
	ENSG00000183813	1233	CCR4		ENSG00000019991	3082	HGF
	ENSG00000126353	1236	CCR7		ENSG00000103966	30844	EHD4
	ENSG00000090659	30835	CD209		ENSG00000013016	30845	EHD3
	ENSG00000120217	29126	CD274		ENSG00000024422	30846	EHD2
	ENSG00000178562	940	CD28		ENSG00000213977	30851	TAX1BP3
	ENSG00000019582	972	CD74		ENSG00000100644	3091	HIF1A
	ENSG00000105369	973	CD79A		ENSG00000204632	3135	HLA-G
	ENSG00000007312	974	CD79B		ENSG00000135486	3178	HNRNPA1
	ENSG00000134371	79577	CDC73		ENSG00000134982	324	APC
	ENSG00000039068	999	CDH1		ENSG00000115738	3398	ID2
	ENSG00000040731	1008	CDH10		ENSG00000138413	3417	IDH1
	ENSG00000140937	1009	CDH11		ENSG00000182054	3418	IDH2
	ENSG00000079112	1015	CDH17		ENSG00000111537	3458	IFNG
	ENSG00000167258	51755	CDK12		ENSG00000177047	3467	IFNW1
	ENSG00000135446	1019	CDK4		ENSG00000176402	349149	GJC3
	ENSG00000105810	1021	CDK6		ENSG00000168811	3592	IL12A
	ENSG00000124762	1026	CDKN1A		ENSG00000113302	3593	IL12B
	ENSG00000111276	1027	CDKN1B		ENSG00000128052	3791	KDR
	ENSG00000147889	1029	CDKN2A		ENSG00000133703	3845	KRAS
	ENSG00000123080	1031	CDKN2C		ENSG00000168028	3921	RPSA
	ENSG00000165556	1045	CDX2		ENSG00000198975	406882	MIRLET7A2
	ENSG00000245848	1050	CEBPA		ENSG00000207994	406892	MIR100
	ENSG00000121289	84902	CEP89		ENSG00000207744	406903	MIR10B
	ENSG00000170791	79145	CHCHD7		ENSG00000207971	406911	MIR125B1
	ENSG00000173575	1106	CHD2		ENSG00000199161	406913	MIR126
	ENSG00000111642	1108	CHD4		ENSG00000207654	406915	MIR128-1
	ENSG00000183765	11200	CHEK2		ENSG00000208009	406919	MIR130A
	ENSG00000109220	26511	CHIC2		ENSG00000207595	406954	MIR181A2
	ENSG00000171310	50515	CHST11		ENSG00000207975	406955	MIR181B1
	ENSG00000079432	23152	CIC		ENSG00000207737	406956	MIR181B2
	ENSG00000179583	4261	CIITA		ENSG00000207759	406995	MIR181A1
	ENSG00000130779	6249	CLIP1		ENSG00000207547	407014	MIR25
	ENSG00000172409	10978	CLP1		ENSG00000207789	407016	MIR26A2
	ENSG00000141367	1213	CLTC		ENSG00000171444	4163	MCC
	ENSG00000070371	8218	CLTCL1		ENSG00000170430	4255	MGMT
	ENSG00000176571	168975	CNBD1		ENSG00000076242	4292	MLH1
	ENSG00000169714	7555	CNBP		ENSG00000120645	440073	IQSEC3
	ENSG00000088038	4849	CNOT3		ENSG00000199090	442900	MIR326
	ENSG00000174469	26047	CNTNAP2		ENSG00000199023	442907	MIR339
	ENSG00000119397	11064	CNTRL		ENSG00000095002	4436	MSH2
	ENSG00000108821	1277	COL1A1		ENSG00000135097	4440	MSI1
	ENSG00000139219	1280	COL2A1		ENSG00000099810	4507	MTAP
	ENSG00000168542	1281	COL3A1		ENSG00000119950	4601	MXI1
	ENSG00000164919	1345	COX6C		ENSG00000104320	4683	NBN
	ENSG00000107864	22849	CPEB3		ENSG00000149311	472	ATM
	ENSG00000118260	1385	CREB1		ENSG00000067141	4756	NEO1
	ENSG00000157613	90993	CREB3L1		ENSG00000196712	4763	NF1
	ENSG00000182158	64764	CREB3L2		ENSG00000100906	4792	NFKBIA
	ENSG00000005339	1387	CREBBP		ENSG00000064300	4804	NGFR
	ENSG00000205755	64109	CRLF2		ENSG00000135577	4829	NMBR
	ENSG00000101343	51340	CRNKL1		ENSG00000007171	4843	NOS2
	ENSG00000105662	23373	CRTC1		ENSG00000104967	4858	NOVA2
	ENSG00000140577	64784	CRTC3		ENSG00000213281	4893	NRAS
	ENSG00000182578	1436	CSF1R		ENSG00000185652	4908	NTF3
	ENSG00000119535	1441	CSF3R		ENSG00000148053	4915	NTRK2
	ENSG00000164796	114788	CSMD3		ENSG00000115758	4953	ODC1
	ENSG00000102974	10664	CTCF		ENSG00000185345	5071	PARK2
	ENSG00000066032	1496	CTNNA2		ENSG00000007372	5080	PAX6
	ENSG00000168036	1499	CTNNB1		ENSG00000196104	50859	SPOCK3
	ENSG00000198561	1500	CTNND1		ENSG00000137558	51050	PI15
	ENSG00000169862	1501	CTNND2		ENSG00000117362	51107	APH1A
	ENSG00000036257	8452	CUL3		ENSG00000111653	51147	ING4
	ENSG00000257923	1523	CUX1		ENSG00000184588	5142	PDE4B
	ENSG00000121966	7852	CXCR4		ENSG00000205268	5150	PDE7A
	ENSG00000083799	1540	CYLD		ENSG00000197461	5154	PDGFA
	ENSG00000138115	1558	CYP2C8		ENSG00000134853	5156	PDGFRA
	ENSG00000152207	57105	CYSLTR2		ENSG00000104213	5157	PDGFRL
	ENSG00000204209	1616	DAXX		ENSG00000107882	51684	SUFU
	ENSG00000198354	340578	DCAF12L2		ENSG00000154269	5169	ENPP3
	ENSG00000187323	1630	DCC		ENSG00000197142	51703	ACSL5
	ENSG00000204843	1639	DCTN1		ENSG00000121879	5290	PIK3CA
	ENSG00000134574	1643	DDB2		ENSG00000145675	5295	PIK3R1
	ENSG00000175197	1649	DDIT3		ENSG00000008710	5310	PKD1
	ENSG00000162733	4921	DDR2		ENSG00000067225	5315	PKM
	ENSG00000178105	1662	DDX10		ENSG00000188257	5320	PLA2G2A
	ENSG00000215301	1654	DDX3X		ENSG00000187091	5333	PLCD1
	ENSG00000108654	1655	DDX5		ENSG00000166851	5347	PLK1
	ENSG00000110367	1656	DDX6		ENSG00000198523	5350	PLN
	ENSG00000124795	7913	DEK		ENSG00000122512	5395	PMS2
	ENSG00000128191	54487	DGCR8		ENSG00000119778	54454	ATAD2B
	ENSG00000100697	23405	DICER1		ENSG00000168209	54541	DDIT4
	ENSG00000132002	3337	DNAJB1		ENSG00000196683	54543	TOMM7
	ENSG00000079805	1785	DNM2		ENSG00000106460	54664	TMEM106B
	ENSG00000119772	1788	DNMT3A		ENSG00000132170	5468	PPARG
	ENSG00000113360	29102	DROSHA		ENSG00000188352	54914	FOCAD
	ENSG00000164330	1879	EBF1		ENSG00000006118	54972	TMEM132A
	ENSG00000203734	345930	ECT2L		ENSG00000172890	55191	NADSYN1
	ENSG00000074266	8726	EED		ENSG00000153012	55203	LGI2
	ENSG00000146648	1956	EGFR		ENSG00000162873	55220	KLHDC8A
	ENSG00000173674	1964	EIF1AX		ENSG00000011485	5536	PPP5C
	ENSG00000104408	3646	EIF3E		ENSG00000186652	5553	PRG2
	ENSG00000156976	1974	EIF4A2		ENSG00000088280	55616	ASAP3
	ENSG00000163435	1999	ELF3		ENSG00000166135	55662	HIF1AN
	ENSG00000102034	2000	ELF4		ENSG00000120008	55717	WDR11
	ENSG00000158711	2005	ELK4		ENSG00000154380	55740	ENAH
	ENSG00000105656	8178	ELL		ENSG00000253729	5591	PRKDC
	ENSG00000049540	2006	ELN		ENSG00000135406	5630	PRPH
	ENSG00000143924	27436	EML4		ENSG00000148384	56623	INPP5E
	ENSG00000100393	2033	EP300		ENSG00000047932	57120	GOPC
	ENSG00000116016	2034	EPAS1		ENSG00000198835	57165	GJC2
	ENSG00000044524	2042	EPHA3		ENSG00000011304	5725	PTBP1
	ENSG00000135333	2045	EPHA7		ENSG00000171862	5728	PTEN
	ENSG00000085832	2060	EPS15		ENSG00000115760	57448	BIRC6
	ENSG00000141736	2064	ERBB2		ENSG00000134313	57498	KIDINS220
	ENSG00000065361	2065	ERBB3		ENSG00000181790	575	ADGRB1
	ENSG00000178568	2066	ERBB4		ENSG00000121753	576	ADGRB2
	ENSG00000082805	23085	ERC1		ENSG00000135298	577	ADGRB3
	ENSG00000104884	2068	ERCC2		ENSG00000179295	5781	PTPN11
	ENSG00000163161	2071	ERCC3		ENSG00000127947	5782	PTPN12
	ENSG00000175595	2072	ERCC4		ENSG00000162706	57863	CADM3
	ENSG00000134899	2073	ERCC5		ENSG00000149177	5795	PTPRJ
	ENSG00000157554	2078	ERG		ENSG00000106278	5803	PTPRZ1
	ENSG00000091831	2099	ESR1		ENSG00000087088	581	BAX
	ENSG00000139163	55500	ETNK1		ENSG00000089159	5829	PXN
	ENSG00000006468	2115	ETV1		ENSG00000144867	58477	SRPRB
	ENSG00000175832	2118	ETV4		ENSG00000136238	5879	RAC1
	ENSG00000244405	2119	ETV5		ENSG00000132155	5894	RAF1
	ENSG00000139083	2120	ETV6		ENSG00000114200	590	BCHE
	ENSG00000182944	2130	EWSR1		ENSG00000139687	5925	RB1
	ENSG00000182197	2131	EXT1		ENSG00000032219	5926	ARID4A
	ENSG00000151348	2132	EXT2		ENSG00000073614	5927	KDM5A
	ENSG00000106462	2146	EZH2		ENSG00000114115	5947	RBP1
	ENSG00000092820	7430	EZR		ENSG00000114113	5948	RBP2
	ENSG00000159784	9715	FAM131B		ENSG00000110092	595	CCND1
	ENSG00000147724	51059	FAM135B		ENSG00000171791	596	BCL2
	ENSG00000183508	54855	FAM46C		ENSG00000159788	6002	RGS12
	ENSG00000198173	442444	FAM47C		ENSG00000047936	6098	ROS1
	ENSG00000187741	2175	FANCA		ENSG00000114993	6242	RTKN
	ENSG00000158169	2176	FANCC		ENSG00000124788	6310	ATXN1
	ENSG00000144554	2177	FANCD2		ENSG00000108691	6347	CCL2
	ENSG00000112039	2178	FANCE		ENSG00000132692	63827	BCAN
	ENSG00000183161	2188	FANCF		ENSG00000132581	6388	SDF2
	ENSG00000221829	2189	FANCG		ENSG00000166801	63901	FAM111A
	ENSG00000026103	355	FAS		ENSG00000128594	64101	LRRC4
	ENSG00000083857	2195	FAT1		ENSG00000178980	6415	SEPW1
	ENSG00000165323	120114	FAT3		ENSG00000008516	64386	MMP25
	ENSG00000196159	79633	FAT4		ENSG00000189431	644943	RASSF10
	ENSG00000163520	2199	FBLN2		ENSG00000182199	6472	SHMT2
	ENSG00000138081	80204	FBXO11		ENSG00000103034	65009	NDRG4
	ENSG00000109670	55294	FBXW7		ENSG00000144426	65065	NBEAL1
	ENSG00000072694	2213	FCGR2B		ENSG00000117394	6513	SLC2A1
	ENSG00000163518	83417	FCRL4		ENSG00000125378	652	BMP4
	ENSG00000168496	2237	FEN1		ENSG00000175003	6580	SLC22A1
	ENSG00000182511	2242	FES		ENSG00000073584	6605	SMARCE1
	ENSG00000163497	54738	FEV		ENSG00000157764	673	BRAF
	ENSG00000077782	2260	FGFR1		ENSG00000139618	675	BRCA2
	ENSG00000213066	11116	FGFR1OP		ENSG00000168610	6774	STAT3
	ENSG00000066468	2263	FGFR2		ENSG00000147526	6867	TACC1
	ENSG00000068078	2261	FGFR3		ENSG00000151694	6868	ADAM17
	ENSG00000160867	2264	FGFR4		ENSG00000184144	6900	CNTN2
	ENSG00000091483	2271	FH		ENSG00000156970	701	BUB1B
	ENSG00000189283	2272	FHIT		ENSG00000164362	7015	TERT
	ENSG00000145216	81608	FIP1L1		ENSG00000092969	7042	TGFB2
	ENSG00000122642	11328	FKBP9		ENSG00000137462	7097	TLR2
	ENSG00000154803	201163	FLCN		ENSG00000141510	7157	TP53
	ENSG00000151702	2313	FLI1		ENSG00000165699	7248	TSC1
	ENSG00000196924	2316	FLNA		ENSG00000103197	7249	TSC2
	ENSG00000122025	2322	FLT3		ENSG00000181649	7262	PHLDA2
	ENSG00000037280	2324	FLT4		ENSG00000150630	7424	VEGFC
	ENSG00000187239	23048	FNBP1		ENSG00000134086	7428	VHL
	ENSG00000129514	3169	FOXA1		ENSG00000152422	7518	XRCC4
	ENSG00000183770	668	FOXL2		ENSG00000130508	7837	PXDN
	ENSG00000150907	2308	FOXO1		ENSG00000140598	79631	EFTUD1
	ENSG00000118689	2309	FOXO3		ENSG00000123607	79809	TTC21B
	ENSG00000184481	4303	FOXO4		ENSG00000166250	79827	CLMP
	ENSG00000114861	27086	FOXP1		ENSG00000106714	79937	CNTNAP3
	ENSG00000176302	283150	FOXR1		ENSG00000197121	80055	PGAP1
	ENSG00000070404	10272	FSTL3		ENSG00000120832	80298	MTERF2
	ENSG00000162613	8880	FUBP1		ENSG00000113742	80315	CPEB4
	ENSG00000089280	2521	FUS		ENSG00000135917	80704	SLC19A3
	ENSG00000007237	8522	GAS7		ENSG00000127337	8089	YEATS4
	ENSG00000102145	2623	GATA1		ENSG00000154978	81552	VOPP1
	ENSG00000179348	2624	GATA2		ENSG00000171206	81603	TRIM8
	ENSG00000107485	2625	GATA3		ENSG00000118518	81847	RNF146
	ENSG00000111087	2735	GLI1		ENSG00000162909	824	CAPN2
	ENSG00000163655	8833	GMPS		ENSG00000138613	83464	APH1B
	ENSG00000088256	2767	GNA11		ENSG00000154080	83539	CHST9
	ENSG00000156052	2776	GNAQ		ENSG00000274267	8358	HIST1H3B
	ENSG00000087460	2778	GNAS		ENSG00000126453	83596	BCL2L12
	ENSG00000066455	9950	GOLGA5		ENSG00000002822	8379	MAD1L1
	ENSG00000047932	57120	GOPC		ENSG00000179632	84232	MAF1
	ENSG00000147257	2719	GPC3		ENSG00000148925	84280	BTBD10
	ENSG00000179399	2262	GPC5		ENSG00000177082	84942	WDR73
	ENSG00000171723	10243	GPHN		ENSG00000065883	8621	CDK13
	ENSG00000183454	2903	GRIN2A		ENSG00000117425	8643	PTCH2
	ENSG00000198822	2913	GRM3		ENSG00000168615	8754	ADAM9
	ENSG00000163041	3020	H3F3A		ENSG00000007062	8842	PROM1
	ENSG00000132475	3021	H3F3B		ENSG00000078269	8871	SYNJ2
	ENSG00000051108	9709	HERPUD1		ENSG00000102606	8874	ARHGEF7
	ENSG00000164683	23462	HEY1		ENSG00000174672	9024	BRSK2
	ENSG00000100644	3091	HIF1A		ENSG00000107954	9148	NEURL1
	ENSG00000127946	3092	HIP1		ENSG00000105204	9149	DYRK1B
	ENSG00000274267	8358	HIST1H3B		ENSG00000145623	9180	OSMR
	ENSG00000276180	8294	HIST1H4I		ENSG00000164182	91942	NDUFAF2
	ENSG00000206503	3105	HLA-A		ENSG00000108231	9211	LGI1
	ENSG00000108924	3131	HLF		ENSG00000130755	9535	GMFG
	ENSG00000137309	3159	HMGA1		ENSG00000138593	9728	SECISBP2L
	ENSG00000149948	8091	HMGA2		ENSG00000128512	9732	DOCK4
	ENSG00000135100	6927	HNF1A		ENSG00000103540	9738	CCP110
	ENSG00000122566	3181	HNRNPA2B1		ENSG00000144711	9922	IQSEC1
	ENSG00000168172	84376	HOOK3
	ENSG00000005073	3207	HOXA11
	ENSG00000106031	3209	HOXA13
	ENSG00000078399	3205	HOXA9
	ENSG00000123364	3229	HOXC13
	ENSG00000128713	3237	HOXD11
	ENSG00000128714	3239	HOXD13
	ENSG00000174775	3265	HRAS
	ENSG00000080824	3320	HSP90AA1
	ENSG00000096384	3326	HSP90AB1
	ENSG00000117318	3399	ID3
	ENSG00000138413	3417	IDH1
	ENSG00000182054	3418	IDH2
	ENSG00000073792	10644	IGF2BP2
	ENSG00000104365	3551	IKBKB
	ENSG00000185811	10320	IKZF1
	ENSG00000109471	3558	IL2
	ENSG00000103522	50615	IL21R
	ENSG00000134352	3572	IL6ST
	ENSG00000168685	3575	IL7R
	ENSG00000137265	3662	IRF4
	ENSG00000133124	8471	IRS4
	ENSG00000175329	91464	ISX
	ENSG00000138448	3685	ITGAV
	ENSG00000113263	3702	ITK
	ENSG00000162434	3716	JAK1
	ENSG00000096968	3717	JAK2
	ENSG00000105639	3718	JAK3
	ENSG00000153814	221895	JAZF1
	ENSG00000177606	3725	JUN
	ENSG00000083168	7994	KAT6A
	ENSG00000156650	23522	KAT6B
	ENSG00000136504	11143	KAT7
	ENSG00000120457	3762	KCNJ5
	ENSG00000073614	5927	KDM5A
	ENSG00000126012	8242	KDM5C
	ENSG00000147050	7403	KDM6A
	ENSG00000128052	3791	KDR
	ENSG00000119537	2531	KDSR
	ENSG00000079999	9817	KEAP1
	ENSG00000122778	57670	KIAA1549
	ENSG00000187164	57698	SHTN1
	ENSG00000170759	3799	KIF5B
	ENSG00000157404	3815	KIT
	ENSG00000136826	9314	KLF4
	ENSG00000067082	1316	KLF6
	ENSG00000167751	3817	KLK2
	ENSG00000118058	4297	KMT2A
	ENSG00000055609	58508	KMT2C
	ENSG00000167548	8085	KMT2D
	ENSG00000128944	90417	KNSTRN
	ENSG00000133703	3845	KRAS
	ENSG00000126777	3895	KTN1
	ENSG00000107929	23185	LARP4B
	ENSG00000002834	3927	LASP1
	ENSG00000182866	3932	LCK
	ENSG00000136167	3936	LCP1
	ENSG00000138795	51176	LEF1
	ENSG00000104660	23484	LEPROTL1
	ENSG00000183722	10186	LHFP
	ENSG00000113594	3977	LIFR
	ENSG00000160789	4000	LMNA
	ENSG00000166407	4004	LMO1
	ENSG00000135363	4005	LMO2
	ENSG00000145012	4026	LPP
	ENSG00000139263	121227	LRIG3
	ENSG00000168702	53353	LRP1B
	ENSG00000257103	26065	LSM14A
	ENSG00000104903	4066	LYL1
	ENSG00000099949	8216	LZTR1
	ENSG00000178573	4094	MAF
	ENSG00000204103	9935	MAFB
	ENSG00000251562	378938	MALAT1
	ENSG00000172175	10892	MALT1
	ENSG00000184384	84441	MAML2
	ENSG00000169032	5604	MAP2K1
	ENSG00000126934	5605	MAP2K2
	ENSG00000065559	6416	MAP2K4
	ENSG00000095015	4214	MAP3K1
	ENSG00000073803	9175	MAP3K13
	ENSG00000100030	5594	MAPK1
	ENSG00000125952	4149	MAX
	ENSG00000180611	151963	MB21D2
	ENSG00000135679	4193	MDM2
	ENSG00000198625	4194	MDM4
	ENSG00000197880	259283	MDS2
	ENSG00000085276	2122	MECOM
	ENSG00000184634	9968	MED12
	ENSG00000133895	4221	MEN1
	ENSG00000105976	4233	MET
	ENSG00000170430	4255	MGMT
	ENSG00000187098	4286	MITF
	ENSG00000196588	57591	MKL1
	ENSG00000178053	4291	MLF1
	ENSG00000076242	4292	MLH1
	ENSG00000130382	4298	MLLT1
	ENSG00000078403	8028	MLLT10
	ENSG00000213190	10962	MLLT11
	ENSG00000171843	4300	MLLT3
	ENSG00000130396	4301	MLLT4
	ENSG00000275023	4302	MLLT6
	ENSG00000169184	4330	MN1
	ENSG00000130675	3110	MNX1
	ENSG00000117400	4352	MPL
	ENSG00000095002	4436	MSH2
	ENSG00000116062	2956	MSH6
	ENSG00000153944	124540	MSI2
	ENSG00000147065	4478	MSN
	ENSG00000214827	4515	MTCP1
	ENSG00000198793	2475	MTOR
	ENSG00000185499	4582	MUC1
	ENSG00000181143	94025	MUC16
	ENSG00000145113	4585	MUC4
	ENSG00000132781	4595	MUTYH
	ENSG00000118513	4602	MYB
	ENSG00000136997	4609	MYC
	ENSG00000116990	4610	MYCL
	ENSG00000134323	4613	MYCN
	ENSG00000172936	4615	MYD88
	ENSG00000133392	4629	MYH11
	ENSG00000100345	4627	MYH9
	ENSG00000197535	4644	MYO5A
	ENSG00000129152	4654	MYOD1
	ENSG00000078177	55728	N4BP2
	ENSG00000166886	4665	NAB2
	ENSG00000196531	4666	NACA
	ENSG00000172915	26960	NBEA
	ENSG00000104320	4683	NBN
	ENSG00000213672	51517	NCKIPSD
	ENSG00000084676	8648	NCOA1
	ENSG00000140396	10499	NCOA2
	ENSG00000266412	8031	NCOA4
	ENSG00000141027	9611	NCOR1
	ENSG00000196498	9612	NCOR2
	ENSG00000104419	10397	NDRG1
	ENSG00000196712	4763	NF1
	ENSG00000186575	4771	NF2
	ENSG00000101096	4773	NFATC2
	ENSG00000116044	4780	NFE2L2
	ENSG00000147862	4781	NFIB
	ENSG00000077150	4791	NFKB2
	ENSG00000146232	4794	NFKBIE
	ENSG00000100503	51199	NIN
	ENSG00000136352	7080	NKX2-1
	ENSG00000147140	4841	NONO
	ENSG00000148400	4851	NOTCH1
	ENSG00000134250	4853	NOTCH2
	ENSG00000181163	4869	NPM1
	ENSG00000119508	8013	NR4A3
	ENSG00000213281	4893	NRAS
	ENSG00000157168	3084	NRG1
	ENSG00000165671	64324	NSD1
	ENSG00000076685	22978	NT5C2
	ENSG00000065057	4913	NTHL1
	ENSG00000198400	4914	NTRK1
	ENSG00000140538	4916	NTRK3
	ENSG00000137497	4926	NUMA1
	ENSG00000126883	8021	NUP214
	ENSG00000110713	4928	NUP98
	ENSG00000184507	256646	NUTM1
	ENSG00000184923	728118	NUTM2A
	ENSG00000188199	729262	NUTM2B
	ENSG00000205927	10215	OLIG2
	ENSG00000127083	4958	OMD
	ENSG00000182162	286530	P2RY8
	ENSG00000070756	26986	PABPC1
	ENSG00000168092	5049	PAFAH1B2
	ENSG00000083093	79728	PALB2
	ENSG00000135903	5077	PAX3
	ENSG00000196092	5079	PAX5
	ENSG00000009709	5081	PAX7
	ENSG00000125618	7849	PAX8
	ENSG00000163939	55193	PBRM1
	ENSG00000185630	5087	PBX1
	ENSG00000169564	5093	PCBP1
	ENSG00000078674	5108	PCM1
	ENSG00000197646	80380	PDCD1LG2
	ENSG00000178104	9659	PDE4DIP
	ENSG00000100311	5155	PDGFB
	ENSG00000134853	5156	PDGFRA
	ENSG00000113721	5159	PDGFRB
	ENSG00000179094	5187	PER1
	ENSG00000156531	84295	PHF6
	ENSG00000109132	8929	PHOX2B
	ENSG00000073921	8301	PICALM
	ENSG00000121879	5290	PIK3CA
	ENSG00000051382	5291	PIK3CB
	ENSG00000145675	5295	PIK3R1
	ENSG00000137193	5292	PIM1
	ENSG00000181690	5324	PLAG1
	ENSG00000124181	5335	PLCG1
	ENSG00000140464	5371	PML
	ENSG00000064933	5378	PMS1
	ENSG00000122512	5395	PMS2
	ENSG00000062822	5424	POLD1
	ENSG00000177084	5426	POLE
	ENSG00000140521	5428	POLG
	ENSG00000051341	10721	POLQ
	ENSG00000128513	25913	POT1
	ENSG00000110777	5450	POU2AF1
	ENSG00000204531	5460	POU5F1
	ENSG00000132170	5468	PPARG
	ENSG00000110841	8496	PPFIBP1
	ENSG00000170836	8493	PPM1D
	ENSG00000105568	5518	PPP2R1A
	ENSG00000119414	5537	PPP6C
	ENSG00000143294	5546	PRCC
	ENSG00000057657	639	PRDM1
	ENSG00000142611	63976	PRDM16
	ENSG00000116731	7799	PRDM2
	ENSG00000046889	80243	PREX2
	ENSG00000180644	5551	PRF1
	ENSG00000072062	5566	PRKACA
	ENSG00000108946	5573	PRKAR1A
	ENSG00000166501	5579	PRKCB
	ENSG00000110844	25766	PRPF40B
	ENSG00000116132	5396	PRRX1
	ENSG00000164985	11168	PSIP1
	ENSG00000185920	5727	PTCH1
	ENSG00000171862	5728	PTEN
	ENSG00000101213	5753	PTK6
	ENSG00000179295	5781	PTPN11
	ENSG00000163629	5783	PTPN13
	ENSG00000111679	5777	PTPN6
	ENSG00000127329	5787	PTPRB
	ENSG00000081237	5788	PTPRC
	ENSG00000153707	5789	PTPRD
	ENSG00000152894	5796	PTPRK
	ENSG00000196090	11122	PTPRT
	ENSG00000170234	114825	PWWP2A
	ENSG00000112531	9444	QKI
	ENSG00000029725	9135	RABEP1
	ENSG00000136238	5879	RAC1
	ENSG00000152942	5884	RAD17
	ENSG00000164754	5885	RAD21
	ENSG00000182185	5890	RAD51B
	ENSG00000132155	5894	RAF1
	ENSG00000160271	5900	RALGDS
	ENSG00000153201	5903	RANBP2
	ENSG00000138698	5910	RAP1GDS1
	ENSG00000131759	5914	RARA
	ENSG00000139687	5925	RB1
	ENSG00000182872	8241	RBM10
	ENSG00000162775	64783	RBM15
	ENSG00000160957	9401	RECQL4
	ENSG00000162924	5966	REL
	ENSG00000165731	5979	RET
	ENSG00000168411	55159	RFWD3
	ENSG00000153165	653489	RGPD3
	ENSG00000182901	6000	RGS7
	ENSG00000067560	387	RHOA
	ENSG00000168421	399	RHOH
	ENSG00000175643	116028	RMI2
	ENSG00000173821	57674	RNF213
	ENSG00000108375	54894	RNF43
	ENSG00000185008	6092	ROBO2
	ENSG00000047936	6098	ROS1
	ENSG00000147403	6134	RPL10
	ENSG00000116251	6146	RPL22
	ENSG00000122406	6125	RPL5
	ENSG00000163902	6184	RPN1
	ENSG00000147655	340419	RSPO2
	ENSG00000146374	84870	RSPO3
	ENSG00000048471	92017	SNX29
	ENSG00000159216	861	RUNX1
	ENSG00000079102	862	RUNX1T1
	ENSG00000143556	6278	S100A7
	ENSG00000101115	57167	SALL4
	ENSG00000126524	51119	SBDS
	ENSG00000124145	6385	SDC4
	ENSG00000073578	6389	SDHA
	ENSG00000167985	54949	SDHAF2
	ENSG00000117118	6390	SDHB
	ENSG00000143252	6391	SDHC
	ENSG00000204370	6392	SDHD
	ENSG00000184702	5413	43348
	ENSG00000125354	23157	43349
	ENSG00000184640	10801	43352
	ENSG00000119335	6418	SET
	ENSG00000152217	26040	SETBP1
	ENSG00000139718	23067	SETD1B
	ENSG00000181555	29072	SETD2
	ENSG00000115524	23451	SF3B1
	ENSG00000116560	6421	SFPQ
	ENSG00000106483	6424	SFRP4
	ENSG00000118515	6446	SGK1
	ENSG00000111252	10019	SH2B3
	ENSG00000141985	6455	SH3GL1
	ENSG00000198053	140885	SIRPA
	ENSG00000126778	6495	SIX1
	ENSG00000170577	10736	SIX2
	ENSG00000157933	6497	SKI
	ENSG00000157765	10568	SLC34A2
	ENSG00000158715	85414	SLC45A3
	ENSG00000175387	4087	SMAD2
	ENSG00000166949	4088	SMAD3
	ENSG00000141646	4089	SMAD4
	ENSG00000127616	6597	SMARCA4
	ENSG00000099956	6598	SMARCB1
	ENSG00000066117	6602	SMARCD1
	ENSG00000073584	6605	SMARCE1
	ENSG00000072501	8243	SMC1A
	ENSG00000128602	6608	SMO
	ENSG00000197157	27044	SND1
	ENSG00000185338	8651	SOCS1
	ENSG00000181449	6657	SOX2
	ENSG00000125285	11166	SOX21
	ENSG00000128487	92521	SPECC1
	ENSG00000065526	23013	SPEN
	ENSG00000121067	8405	SPOP
	ENSG00000197122	6714	SRC
	ENSG00000196220	9901	SRGAP3
	ENSG00000161547	6427	SRSF2
	ENSG00000112081	6428	SRSF3
	ENSG00000141380	6760	SS18
	ENSG00000184402	26039	SS18L1
	ENSG00000126752	6756	SSX1
	ENSG00000241476	6757	SSX2
	ENSG00000268009	6759	SSX4
	ENSG00000118007	10274	STAG1
	ENSG00000101972	10735	STAG2
	ENSG00000168610	6774	STAT3
	ENSG00000173757	6777	STAT5B
	ENSG00000166888	6778	STAT6
	ENSG00000123473	6491	STIL
	ENSG00000118046	6794	STK11
	ENSG00000115808	6801	STRN
	ENSG00000107882	51684	SUFU
	ENSG00000178691	23512	SUZ12
	ENSG00000165025	6850	SYK
	ENSG00000270647	8148	TAF15
	ENSG00000162367	6886	TAL1
	ENSG00000186051	6887	TAL2
	ENSG00000177565	79718	TBL1XR1
	ENSG00000135111	6926	TBX3
	ENSG00000187735	6917	TCEA1
	ENSG00000140262	6938	TCF12
	ENSG00000071564	6929	TCF3
	ENSG00000148737	6934	TCF7L2
	ENSG00000100721	8115	TCL1A
	ENSG00000135605	7006	TEC
	ENSG00000164362	7015	TERT
	ENSG00000138336	80312	TET1
	ENSG00000168769	54790	TET2
	ENSG00000068323	7030	TFE3
	ENSG00000112561	7942	TFEB
	ENSG00000114354	10342	TFG
	ENSG00000105619	29844	TFPT
	ENSG00000072274	7037	TFRC
	ENSG00000163513	7048	TGFBR2
	ENSG00000054118	9967	THRAP3
	ENSG00000107807	3195	TLX1
	ENSG00000164438	30012	TLX3
	ENSG00000135956	55654	TMEM127
	ENSG00000184012	7113	TMPRSS2
	ENSG00000041982	3371	TNC
	ENSG00000118503	7128	TNFAIP3
	ENSG00000157873	8764	TNFRSF14
	ENSG00000048462	608	TNFRSF17
	ENSG00000198900	7150	TOP1
	ENSG00000141510	7157	TP53
	ENSG00000073282	8626	TP63
	ENSG00000143549	7170	TPM3
	ENSG00000167460	7171	TPM4
	ENSG00000047410	7175	TPR
	ENSG00000131653	84231	TRAF7
	ENSG00000122779	8805	TRIM24
	ENSG00000204713	5987	TRIM27
	ENSG00000197323	51592	TRIM33
	ENSG00000100815	9321	TRIP11
	ENSG00000196367	8295	TRRAP
	ENSG00000165699	7248	TSC1
	ENSG00000103197	7249	TSC2
	ENSG00000165409	7253	TSHR
	ENSG00000160201	7307	U2AF1
	ENSG00000104517	51366	UBR5
	ENSG00000136014	84101	USP44
	ENSG00000129204	9098	USP6
	ENSG00000138592	9101	USP8
	ENSG00000141968	7409	VAV1
	ENSG00000134086	7428	VHL
	ENSG00000151532	143187	VTI1A
	ENSG00000015285	7454	WAS
	ENSG00000109685	7468	WHSC1
	ENSG00000147548	54904	WHSC1L1
	ENSG00000156076	11197	WIF1
	ENSG00000165238	65268	WNK2
	ENSG00000165392	7486	WRN
	ENSG00000184937	7490	WT1
	ENSG00000018408	25937	WWTR1
	ENSG00000136936	7507	XPA
	ENSG00000154767	7508	XPC
	ENSG00000082898	7514	XPO1
	ENSG00000108953	7531	YWHAE
	ENSG00000109906	7704	ZBTB16
	ENSG00000033030	55596	ZCCHC8
	ENSG00000148516	6935	ZEB1
	ENSG00000140836	463	ZFHX3
	ENSG00000147130	9203	ZMYM3
	ENSG00000121741	7750	ZMYM2
	ENSG00000100105	23598	PATZ1
	ENSG00000130844	55422	ZNF331
	ENSG00000126746	171017	ZNF384
	ENSG00000197013	353088	ZNF429
	ENSG00000185177	90827	ZNF479
	ENSG00000198795	25925	ZNF521
	ENSG00000183579	84133	ZNRF3
	ENSG00000169249	8233	ZRSR2
